# Supplementary material for: Hierarchical structures and magnetism of Co clusters: a perspective from integration of deep learning and a hybrid differential evolution algorithm
Source: Royal Society of Chemistry journal article supplement (doi:10.1039/d4nr02431a), 2024-01-01
Supplement: d4nr02431a1.pdf [file d4nr02431a1.pdf]

## SUPPORTING INFORMATION

### **Hierarchical structures and magnetism of Co clusters: A perspective from integration of deep learning and hybrid differential evolution algorithm**

Wei-Hua Yang <sup>a</sup>, Fang-Qi Yu <sup>a</sup>, Zi-Wen Guo <sup>b</sup>, Rao Huang <sup>a,\*</sup>, Jun-Ren Chen <sup>c</sup>, Feng-Qiang Gao <sup>c</sup>, Gui-Fang Shao <sup>d</sup>, Tun-Dong Liu <sup>d</sup>, and Yu-Hua Wen <sup>a,\*</sup>

<sup>a</sup> *Department of Physics, Xiamen University, Xiamen 361005, China*

<sup>b</sup> *Institute of Artificial Intelligence, Xiamen University, Xiamen 361005, China*

<sup>c</sup> *Xiamen University Tan Kah Kee College, Zhangzhou, 363105, China*

<sup>d</sup> *Pen-Tung Sah Institute of Micro-Nano Science and Technology, Xiamen University, Xiamen 361102, China*

\*Correspondence should be addressed to Y. H. W. (yhwen@xmu.edu.cn), and R. H. (huangrao@xmu.edu.cn).

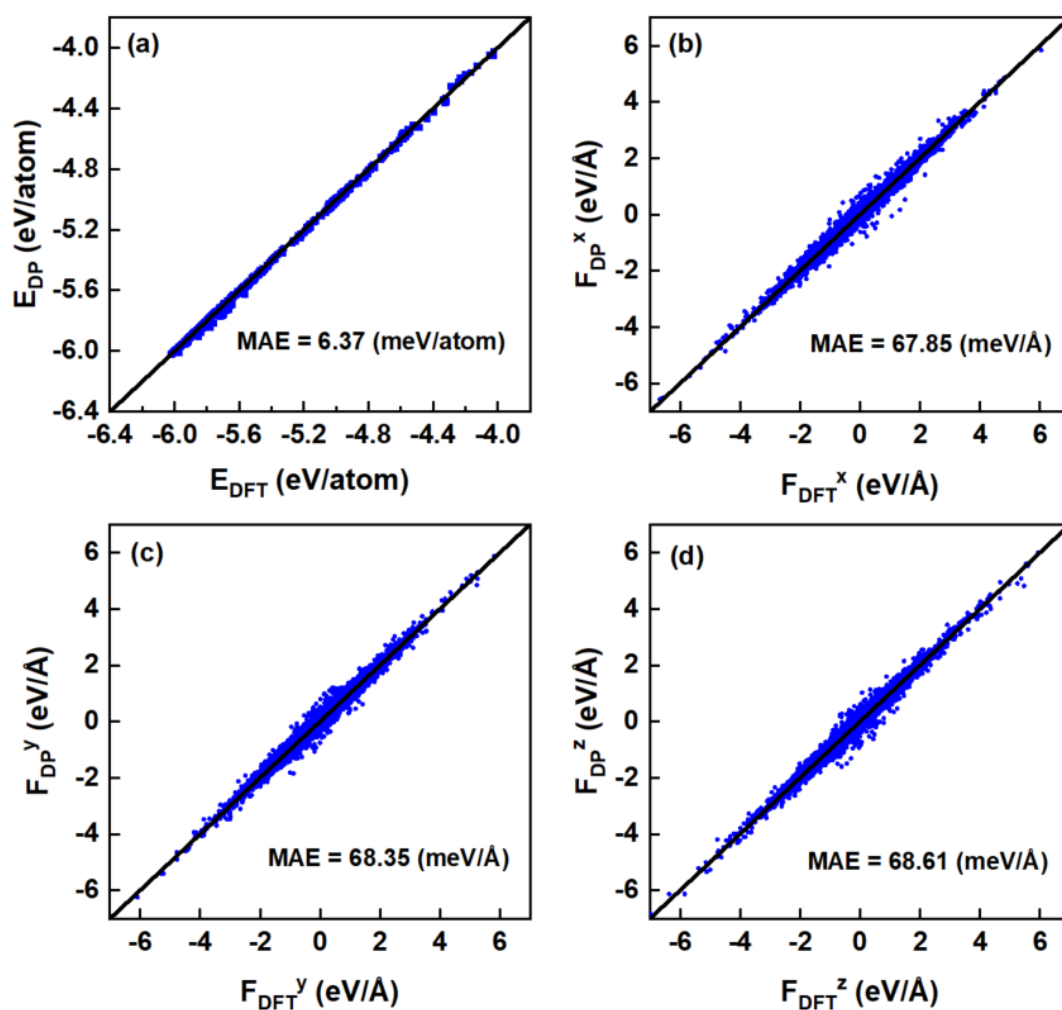

**Fig. S1** Comparison of the results from the DP model and DFT calculations: (a) total energy of cluster, and forces on atom along the (b)  $x$ , (c)  $y$ , and (d)  $z$  directions.

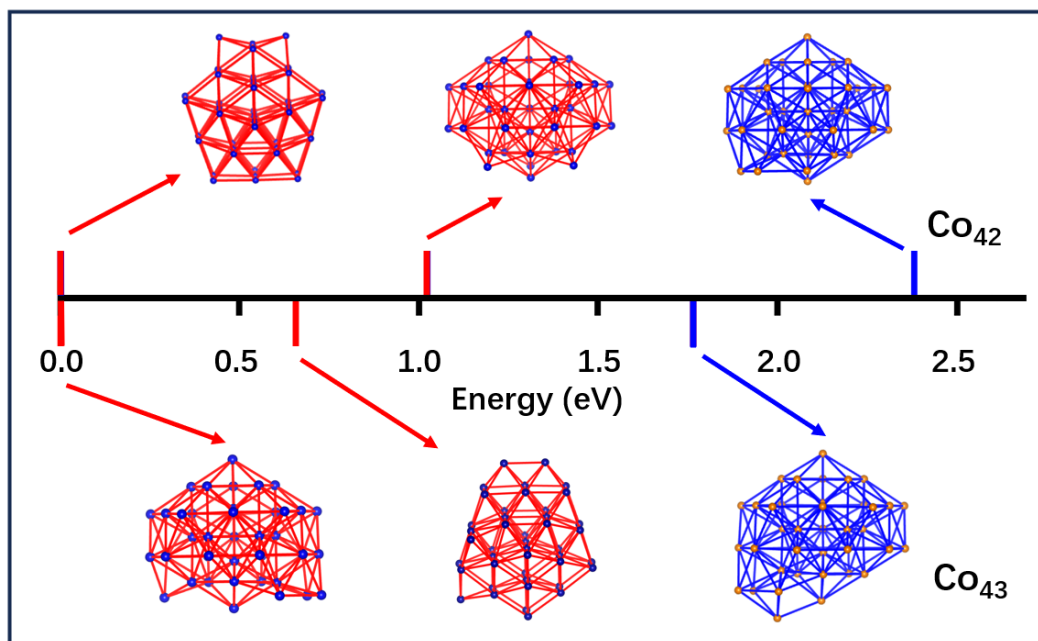

**Fig. S2** Structures and relative energy distribution of  $\text{Co}_{42}$  and  $\text{Co}_{43}$  obtained by DP model. Colors indicate prediction comparisons: blue bonds represent structures already recorded in the CCD, while red bonds denote those newly identified using our DP model.

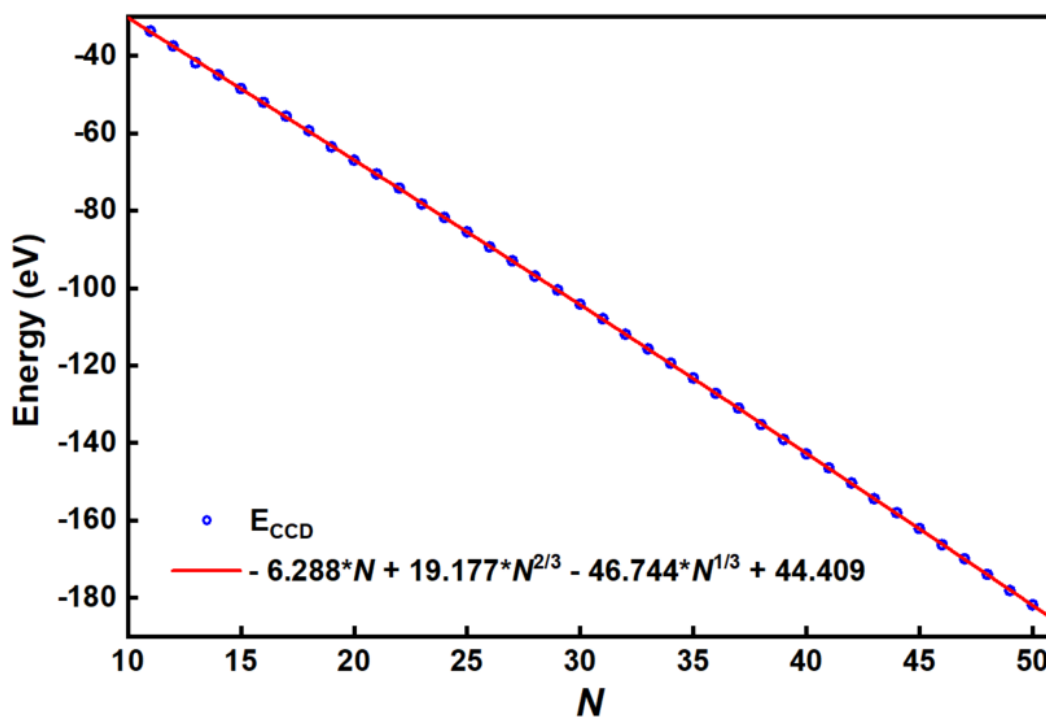

**Fig. S3** The fitting curve of Gupta potential energy for  $\text{Co}_N$  ( $N = 11-50$ ) in CCD.

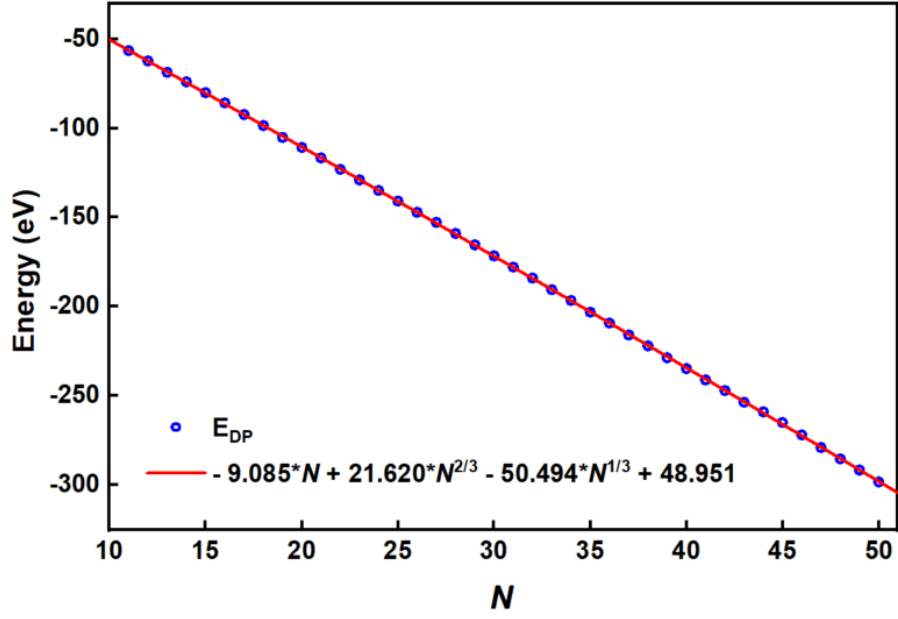

**Fig. S4** The fitting curve of DP energy for  $\text{Co}_N$  ( $N = 11\text{--}50$ ) in our work.

**Table S1** Spin gaps ( $\delta_1$ ,  $\delta_2$ ) of the lowest-energy  $\text{Co}_N$  ( $N = 11\text{--}50$ ) clusters

|    | $\delta_1$ | $\delta_2$ | $N$ | $\delta_1$ | $\delta_2$ | $N$ | $\delta_1$ | $\delta_2$ | $N$ | $\delta_1$ | $\delta_2$ |
|----|------------|------------|-----|------------|------------|-----|------------|------------|-----|------------|------------|
| 11 | 0.300      | 0.145      | 21  | 0.151      | 0.448      | 31  | 0.220      | 0.101      | 41  | 0.339      | 0.188      |
| 12 | 0.362      | 0.159      | 22  | 0.301      | 0.438      | 32  | 0.207      | 0.170      | 42  | 0.076      | 0.324      |
| 13 | 0.265      | 0.615      | 23  | 0.413      | 0.427      | 33  | 0.193      | 0.207      | 43  | 0.258      | 0.333      |
| 14 | 0.131      | 0.149      | 24  | 0.377      | 0.355      | 34  | 0.104      | 0.074      | 44  | 0.080      | 0.046      |
| 15 | 0.384      | 0.118      | 25  | 0.450      | 0.111      | 35  | 0.126      | 0.095      | 45  | 0.036      | 0.129      |
| 16 | 0.069      | 0.687      | 26  | 0.388      | 0.162      | 36  | 0.081      | 0.048      | 46  | 0.344      | 0.037      |
| 17 | 0.251      | 0.178      | 27  | 0.327      | 0.169      | 37  | 0.051      | 0.326      | 47  | 0.218      | 0.177      |
| 18 | 0.332      | 0.056      | 28  | 0.731      | 0.068      | 38  | 0.037      | 0.317      | 48  | 0.359      | 0.100      |
| 19 | 0.279      | 0.816      | 29  | 0.282      | 0.186      | 39  | 0.359      | 0.347      | 49  | 0.429      | 0.066      |
| 20 | 0.262      | 0.832      | 30  | 0.249      | 0.157      | 40  | 0.348      | 0.304      | 50  | 0.160      | 0.086      |

**Table S2** Coordinates of the the lowest-energy  $\text{Co}_N$  ( $N = 11-50$ ) clusters

| Coordinates for $\text{Co}_{11}$ |           |          | Coordinates for $\text{Co}_{12}$ |          |           |
|----------------------------------|-----------|----------|----------------------------------|----------|-----------|
| X                                | Y         | Z        | X                                | Y        | Z         |
| 8.087924                         | 6.467290  | 5.689802 | 8.271992                         | 7.174581 | 7.252826  |
| 7.241415                         | 8.803744  | 5.671938 | 6.478629                         | 6.410141 | 8.616311  |
| 8.862679                         | 7.339734  | 9.526357 | 7.997046                         | 4.878896 | 7.801463  |
| 8.590343                         | 8.005454  | 7.334650 | 7.071352                         | 7.993193 | 10.247223 |
| 7.027134                         | 4.890864  | 6.937045 | 6.066899                         | 7.144552 | 6.361414  |
| 7.721095                         | 10.134991 | 7.515176 | 8.380602                         | 9.481716 | 6.696376  |
| 5.628069                         | 9.389213  | 7.203298 | 6.264268                         | 9.426329 | 5.845909  |
| 7.068237                         | 6.063465  | 8.928614 | 8.795654                         | 8.745004 | 8.956176  |
| 8.985427                         | 5.770985  | 7.753699 | 7.794342                         | 7.930744 | 5.052466  |
| 6.925975                         | 8.459266  | 8.901014 | 7.598804                         | 5.591776 | 5.613916  |
| 6.361699                         | 7.174993  | 7.038410 | 8.607448                         | 6.481051 | 9.499656  |
|                                  |           |          | 6.672964                         | 8.742019 | 8.056268  |

  

| Coordinates for $\text{Co}_{13}$ |          |           | Coordinates for $\text{Co}_{14}$ |           |           |
|----------------------------------|----------|-----------|----------------------------------|-----------|-----------|
| X                                | Y        | Z         | X                                | Y         | Z         |
| 8.396292                         | 7.376436 | 7.295969  | 10.861840                        | 10.049307 | 9.672716  |
| 6.008394                         | 5.077733 | 6.982282  | 8.517179                         | 7.735269  | 9.175551  |
| 6.602929                         | 6.611996 | 8.659454  | 8.822189                         | 9.301350  | 10.819402 |
| 8.121346                         | 5.080751 | 7.844606  | 10.510499                        | 7.785419  | 10.316188 |
| 7.195652                         | 8.195048 | 10.290366 | 9.716857                         | 10.495850 | 12.558064 |
| 6.191199                         | 7.346407 | 6.404557  | 8.742689                         | 10.041379 | 8.582975  |
| 8.504902                         | 9.683571 | 6.739519  | 11.046910                        | 12.347520 | 9.126762  |
| 6.388568                         | 9.628184 | 5.889052  | 8.985237                         | 12.306757 | 8.166100  |
| 8.919954                         | 8.946859 | 8.999319  | 11.341628                        | 11.641817 | 11.389373 |
| 7.918642                         | 8.132599 | 5.095609  | 10.579133                        | 10.807234 | 7.453288  |
| 7.723104                         | 5.793631 | 5.657059  | 10.335440                        | 8.451779  | 8.024966  |
| 8.731748                         | 6.682906 | 9.542799  | 11.532137                        | 9.329493  | 11.829890 |
| 6.797264                         | 8.943874 | 8.099411  | 9.251933                         | 11.614129 | 10.381416 |
|                                  |          |           | 9.756329                         | 8.092694  | 12.503308 |

  

| Coordinates for $\text{Co}_{15}$ |           |           | Coordinates for $\text{Co}_{16}$ |           |           |
|----------------------------------|-----------|-----------|----------------------------------|-----------|-----------|
| X                                | Y         | Z         | X                                | Y         | Z         |
| 10.997013                        | 10.201316 | 9.445552  | 13.056553                        | 10.946611 | 10.090562 |
| 8.722201                         | 7.730611  | 9.368689  | 9.088220                         | 7.416613  | 9.456260  |
| 9.097287                         | 9.511468  | 10.867211 | 7.873736                         | 8.923789  | 10.799664 |
| 10.806657                        | 7.955735  | 10.317043 | 12.304122                        | 8.860240  | 9.520575  |
| 9.657746                         | 11.268573 | 12.335602 | 8.755180                         | 11.028239 | 11.385989 |
| 8.845664                         | 9.959814  | 8.487333  | 8.280026                         | 9.359769  | 8.518923  |
| 11.078272                        | 12.400342 | 8.647347  | 10.524530                        | 11.248873 | 12.900340 |
| 8.990725                         | 12.156529 | 7.746648  | 11.342901                        | 10.719329 | 8.514403  |

|           |           |           |           |           |           |
|-----------|-----------|-----------|-----------|-----------|-----------|
| 11.415863 | 11.951027 | 10.997238 | 10.947654 | 11.667523 | 10.674592 |
| 10.615630 | 10.650763 | 7.180161  | 9.578548  | 10.538222 | 6.991483  |
| 10.472859 | 8.384854  | 8.006669  | 10.443272 | 8.617049  | 7.948257  |
| 11.273459 | 9.721044  | 11.797420 | 11.857089 | 9.795594  | 11.695499 |
| 9.327035  | 11.780223 | 10.013916 | 9.141284  | 11.453376 | 9.069824  |
| 9.126340  | 7.318812  | 11.685942 | 10.111991 | 9.407018  | 10.164710 |
| 9.573248  | 9.008889  | 13.103229 | 9.657084  | 9.176231  | 12.457985 |
|           |           |           | 7.037809  | 10.841524 | 9.810932  |

| Coordinates for Co <sub>17</sub> |           |           | Coordinates for Co <sub>18</sub> |           |           |
|----------------------------------|-----------|-----------|----------------------------------|-----------|-----------|
| X                                | Y         | Z         | X                                | Y         | Z         |
| 12.962361                        | 11.215213 | 9.940094  | 13.134234                        | 10.502769 | 9.623523  |
| 9.282601                         | 7.480296  | 9.555830  | 9.630100                         | 7.642248  | 9.796604  |
| 7.891033                         | 8.962373  | 10.790534 | 7.860916                         | 8.921562  | 10.754309 |
| 12.232333                        | 9.063724  | 9.462010  | 11.428783                        | 11.766101 | 10.616652 |
| 8.651433                         | 11.156140 | 11.330120 | 8.154686                         | 11.269725 | 11.162544 |
| 8.216003                         | 9.395247  | 8.481163  | 7.669335                         | 8.086444  | 8.598971  |
| 10.425785                        | 11.427079 | 12.835148 | 10.100739                        | 10.860218 | 12.370394 |
| 11.217449                        | 10.941815 | 8.401464  | 11.201192                        | 10.909075 | 8.372885  |
| 10.825181                        | 11.879478 | 10.585459 | 9.629911                         | 9.146876  | 7.918665  |
| 9.447079                         | 10.607146 | 6.904590  | 9.224119                         | 11.325572 | 7.196644  |
| 10.423558                        | 8.750845  | 7.900103  | 9.895611                         | 9.989477  | 10.164622 |
| 11.820620                        | 10.018766 | 11.593809 | 11.923960                        | 9.542138  | 11.379187 |
| 8.960054                         | 11.556852 | 8.974891  | 9.414274                         | 12.190013 | 9.366313  |
| 10.020560                        | 9.671034  | 10.042089 | 11.703886                        | 8.710450  | 9.205913  |
| 9.699808                         | 9.275252  | 12.352442 | 9.881156                         | 8.496444  | 12.008205 |
| 6.910504                         | 10.819012 | 9.799644  | 7.899745                         | 10.388952 | 8.881491  |
| 11.013639                        | 7.779728  | 11.050610 | 11.583365                        | 7.262816  | 11.028279 |
|                                  |           |           | 9.663987                         | 12.989120 | 11.554798 |

| Coordinates for Co <sub>19</sub> |           |           | Coordinates for Co <sub>20</sub> |           |           |
|----------------------------------|-----------|-----------|----------------------------------|-----------|-----------|
| X                                | Y         | Z         | X                                | Y         | Z         |
| 10.000000                        | 10.000000 | 10.000000 | 10.129069                        | 10.055949 | 10.133132 |
| 10.804826                        | 9.546436  | 7.780302  | 9.001562                         | 6.993103  | 9.712190  |
| 9.195174                         | 10.453564 | 12.219698 | 7.922622                         | 9.037625  | 9.824837  |
| 9.361872                         | 11.428707 | 8.174592  | 11.918634                        | 9.612829  | 8.585863  |
| 9.181003                         | 8.089837  | 8.791262  | 9.111995                         | 12.236183 | 10.204381 |
| 12.976761                        | 9.586823  | 8.635996  | 7.661576                         | 8.986339  | 7.587967  |
| 11.414356                        | 10.467324 | 12.945087 | 10.496685                        | 11.493260 | 12.011863 |
| 7.738049                         | 9.972108  | 9.185553  | 10.904569                        | 11.789328 | 8.654304  |
| 10.638128                        | 8.571293  | 11.825408 | 11.232087                        | 13.137449 | 10.520375 |
| 12.261951                        | 10.027892 | 10.814447 | 10.486094                        | 10.324814 | 6.872804  |
| 8.376177                         | 8.543401  | 11.010961 | 9.785734                         | 8.573186  | 8.213763  |
| 8.585644                         | 9.532676  | 7.054913  | 12.281615                        | 11.048311 | 10.468395 |

|           |           |           |           |           |           |
|-----------|-----------|-----------|-----------|-----------|-----------|
| 8.557046  | 11.882271 | 10.394291 | 8.727611  | 10.844249 | 8.285177  |
| 11.442954 | 8.117729  | 9.605709  | 11.144122 | 7.874605  | 10.067231 |
| 7.023239  | 10.413177 | 11.364004 | 9.358586  | 8.319705  | 11.611223 |
| 10.818997 | 11.910163 | 11.208738 | 7.050209  | 11.181315 | 9.843889  |
| 9.824440  | 6.759133  | 10.598569 | 8.340524  | 10.504784 | 11.679933 |
| 11.623823 | 11.456599 | 8.989039  | 11.510405 | 9.317499  | 11.943446 |
| 10.175560 | 13.240867 | 9.401431  | 9.730674  | 9.767854  | 13.392047 |
|           |           |           | 13.205628 | 8.901613  | 10.387179 |

| Coordinates for Co <sub>21</sub> |           |           | Coordinates for Co <sub>22</sub> |           |           |
|----------------------------------|-----------|-----------|----------------------------------|-----------|-----------|
| X                                | Y         | Z         | X                                | Y         | Z         |
| 10.308590                        | 10.158392 | 9.404421  | 10.174830                        | 10.163111 | 9.469897  |
| 11.021023                        | 9.469387  | 7.268536  | 10.865566                        | 9.365063  | 7.377679  |
| 9.539910                         | 10.864201 | 11.657172 | 9.436523                         | 10.918708 | 11.707322 |
| 9.618292                         | 11.380334 | 7.500138  | 9.541737                         | 11.358614 | 7.555435  |
| 9.451062                         | 8.141465  | 8.445641  | 9.211016                         | 8.163079  | 8.578772  |
| 12.566807                        | 10.239195 | 10.149740 | 12.435078                        | 10.154799 | 10.254682 |
| 11.831692                        | 10.918569 | 12.282118 | 11.725480                        | 10.935600 | 12.347177 |
| 8.021259                         | 10.051418 | 8.685508  | 7.890912                         | 10.151353 | 8.755999  |
| 11.002465                        | 8.892244  | 11.396339 | 10.760073                        | 8.922612  | 11.529914 |
| 9.392275                         | 7.643360  | 12.524924 | 9.112498                         | 7.770073  | 12.695604 |
| 8.653067                         | 8.785653  | 10.644886 | 8.480160                         | 8.920890  | 10.777683 |
| 8.792508                         | 9.381268  | 6.606586  | 8.609465                         | 9.373185  | 6.686758  |
| 8.882882                         | 12.070855 | 9.669006  | 8.843538                         | 12.139209 | 9.684061  |
| 11.720656                        | 8.256021  | 9.183903  | 13.089662                        | 9.376546  | 8.164793  |
| 7.313053                         | 10.743254 | 10.827843 | 7.215707                         | 10.932466 | 10.860074 |
| 11.164510                        | 12.157375 | 10.401454 | 11.114283                        | 12.140884 | 10.433235 |
| 10.141230                        | 6.956533  | 10.352543 | 9.834642                         | 6.986896  | 10.507439 |
| 11.877971                        | 11.477867 | 8.246698  | 11.820684                        | 11.360377 | 8.307523  |
| 10.467974                        | 13.308155 | 8.519044  | 10.487648                        | 13.295836 | 8.513094  |
| 8.006995                         | 9.507557  | 12.757175 | 7.830541                         | 9.702132  | 12.868601 |
| 10.225780                        | 9.596897  | 13.476328 | 10.037830                        | 9.703938  | 13.596578 |
|                                  |           |           | 11.482125                        | 8.164633  | 9.327682  |

| Coordinates for Co <sub>23</sub> |           |           | Coordinates for Co <sub>24</sub> |           |          |
|----------------------------------|-----------|-----------|----------------------------------|-----------|----------|
| X                                | Y         | Z         | X                                | Y         | Z        |
| 11.220225                        | 10.362333 | 8.041617  | 9.641844                         | 8.574284  | 7.513188 |
| 9.529786                         | 9.797041  | 6.525712  | 13.047872                        | 10.542763 | 8.593996 |
| 9.551039                         | 10.276703 | 9.803391  | 10.140731                        | 10.845915 | 7.045573 |
| 12.852995                        | 8.234671  | 11.203114 | 11.321326                        | 12.151216 | 8.621781 |
| 9.853817                         | 8.359805  | 8.343531  | 11.892137                        | 9.274261  | 7.057818 |
| 11.958690                        | 10.235115 | 10.378074 | 10.854705                        | 9.872129  | 9.060339 |
| 12.555851                        | 10.069831 | 12.611964 | 9.037758                         | 11.542782 | 9.046250 |
| 7.875049                         | 9.711055  | 8.218852  | 7.927558                         | 10.201409 | 7.487485 |

|           |           |           |           |           |           |
|-----------|-----------|-----------|-----------|-----------|-----------|
| 11.253814 | 8.161642  | 12.899654 | 6.874680  | 10.842834 | 9.587303  |
| 7.927634  | 10.170500 | 11.552007 | 11.472857 | 7.635825  | 8.694096  |
| 8.206358  | 8.306203  | 10.126558 | 12.063119 | 11.199273 | 10.668138 |
| 6.331640  | 9.647695  | 9.958742  | 8.492479  | 9.123691  | 9.511791  |
| 9.223255  | 11.686906 | 7.920960  | 8.825160  | 11.142698 | 13.174477 |
| 12.152314 | 8.368071  | 8.916769  | 8.077548  | 12.102829 | 11.160304 |
| 7.588343  | 11.595561 | 9.668273  | 12.656876 | 8.932875  | 10.274542 |
| 9.282444  | 12.156030 | 11.252656 | 10.289490 | 12.779823 | 10.679635 |
| 10.569901 | 8.199787  | 10.684933 | 9.805226  | 10.511483 | 11.153379 |
| 10.899152 | 12.252602 | 9.531573  | 9.286837  | 6.925888  | 9.169609  |
| 8.944116  | 13.476386 | 9.381504  | 7.596452  | 9.820361  | 11.592438 |
| 8.907421  | 8.202068  | 12.362007 | 8.233958  | 7.567313  | 11.269428 |
| 10.274559 | 10.137352 | 12.153627 | 9.409674  | 8.892739  | 12.808826 |
| 11.566106 | 12.098480 | 11.774559 | 10.443373 | 8.155604  | 10.785715 |
| 11.475493 | 8.494161  | 6.689923  | 10.983301 | 11.800523 | 12.711494 |
|           |           |           | 11.625040 | 9.561481  | 12.332395 |

| Coordinates for CO <sub>25</sub> |           |           | Coordinates for CO <sub>26</sub> |           |           |
|----------------------------------|-----------|-----------|----------------------------------|-----------|-----------|
| X                                | Y         | Z         | X                                | Y         | Z         |
| 9.515742                         | 8.644710  | 7.559650  | 9.161679                         | 8.973104  | 7.569630  |
| 12.899554                        | 10.710956 | 8.674455  | 13.080740                        | 10.042231 | 8.101947  |
| 9.968570                         | 10.943496 | 7.105994  | 10.085669                        | 11.126202 | 7.145701  |
| 11.117331                        | 12.273311 | 8.707682  | 11.811755                        | 11.991938 | 8.526087  |
| 11.768338                        | 9.401596  | 7.109516  | 11.405526                        | 9.202011  | 6.762245  |
| 10.719925                        | 9.962404  | 9.119677  | 10.921073                        | 9.844836  | 8.945570  |
| 8.862199                         | 11.580267 | 9.125524  | 9.572823                         | 11.890167 | 9.348702  |
| 7.776572                         | 10.236750 | 7.552156  | 7.857761                         | 10.917830 | 8.002228  |
| 6.715538                         | 10.829997 | 9.658613  | 6.484577                         | 9.425306  | 10.637866 |
| 11.373581                        | 7.718517  | 8.749173  | 10.893355                        | 7.552358  | 8.377145  |
| 11.890270                        | 11.322452 | 10.758605 | 12.648498                        | 10.721953 | 10.358108 |
| 8.374891                         | 9.153560  | 9.569267  | 6.951497                         | 8.785435  | 8.474613  |
| 8.655325                         | 11.149802 | 13.251986 | 8.189823                         | 10.304943 | 12.072262 |
| 7.885048                         | 12.104215 | 11.243551 | 7.376662                         | 11.577133 | 10.231174 |
| 12.546519                        | 9.056865  | 10.367268 | 12.619442                        | 8.418094  | 9.757531  |
| 10.074009                        | 12.845849 | 10.772039 | 11.326139                        | 12.657430 | 10.775959 |
| 9.654342                         | 10.557477 | 11.224685 | 10.426563                        | 10.522516 | 11.236646 |
| 9.194522                         | 6.964503  | 9.214477  | 8.665448                         | 7.343987  | 9.233672  |
| 7.461596                         | 9.810301  | 11.656346 | 8.652364                         | 9.632648  | 9.817784  |
| 8.138396                         | 7.574517  | 11.313923 | 8.184349                         | 8.003290  | 11.462618 |
| 9.287654                         | 8.915192  | 12.867053 | 9.926640                         | 8.877154  | 12.855964 |
| 10.327311                        | 8.216656  | 10.848515 | 10.427177                        | 8.109833  | 10.651298 |
| 10.794205                        | 11.871376 | 12.793605 | 12.109897                        | 11.372683 | 12.599889 |
| 11.486646                        | 9.647042  | 12.419257 | 12.133826                        | 9.083587  | 12.007403 |
| 13.511917                        | 8.508187  | 8.336984  | 9.967764                         | 11.172334 | 13.423440 |



9.118953 12.450997 11.624519

| Coordinates for Co <sub>27</sub> |           |           | Coordinates for Co <sub>28</sub> |           |           |
|----------------------------------|-----------|-----------|----------------------------------|-----------|-----------|
| X                                | Y         | Z         | X                                | Y         | Z         |
| 9.022976                         | 8.962953  | 7.527392  | 9.106465                         | 9.459352  | 7.345530  |
| 12.961200                        | 10.095768 | 8.113092  | 13.064917                        | 10.001983 | 8.264477  |
| 9.900477                         | 11.121992 | 7.092538  | 10.383970                        | 11.430579 | 6.934474  |
| 11.603759                        | 12.041616 | 8.451880  | 12.044213                        | 12.148681 | 8.455065  |
| 11.302920                        | 9.232400  | 6.737206  | 10.809366                        | 10.192181 | 8.855717  |
| 10.755776                        | 9.877124  | 8.891019  | 11.427729                        | 9.297950  | 6.791909  |
| 9.390509                         | 11.877795 | 9.305676  | 9.723285                         | 12.361581 | 9.064931  |
| 7.690089                         | 10.884043 | 7.958534  | 8.119184                         | 11.590955 | 7.481927  |
| 6.319036                         | 9.394484  | 10.601881 | 6.602303                         | 9.129926  | 10.328516 |
| 10.762467                        | 7.576296  | 8.346175  | 10.554882                        | 7.828022  | 8.417893  |
| 12.495863                        | 10.857357 | 10.294791 | 12.542984                        | 10.894574 | 10.402242 |
| 6.797218                         | 8.747967  | 8.433789  | 6.835614                         | 9.565716  | 7.938310  |
| 8.027860                         | 10.308321 | 12.039449 | 8.238914                         | 9.953299  | 11.850510 |
| 7.198271                         | 11.549025 | 10.188655 | 8.355088                         | 10.402455 | 9.471409  |
| 12.496384                        | 8.460425  | 9.721429  | 12.214565                        | 8.543990  | 9.921292  |
| 11.102384                        | 12.719475 | 10.725307 | 11.406997                        | 13.014638 | 10.583210 |
| 10.246930                        | 10.565063 | 11.198252 | 9.952250                         | 10.654419 | 13.313197 |
| 8.541842                         | 7.345585  | 9.200986  | 9.895591                         | 8.709649  | 10.570512 |
| 8.487939                         | 9.625462  | 9.778189  | 8.208859                         | 8.003054  | 9.029981  |
| 8.049780                         | 8.010768  | 11.431844 | 8.019458                         | 7.594332  | 11.371732 |
| 9.775672                         | 8.910242  | 12.820096 | 9.687595                         | 8.325242  | 12.877508 |
| 10.276730                        | 8.154513  | 10.611284 | 9.663932                         | 6.436320  | 10.101860 |
| 11.987445                        | 11.412316 | 12.528576 | 10.240024                        | 11.061811 | 11.045896 |
| 11.996792                        | 9.135704  | 11.986375 | 11.637322                        | 9.425204  | 12.101813 |
| 9.837646                         | 11.213436 | 13.381361 | 11.296647                        | 7.133095  | 11.582823 |
| 8.911361                         | 12.459288 | 11.577598 | 8.196905                         | 12.207497 | 10.947672 |
| 14.060673                        | 9.460581  | 11.056624 | 9.838289                         | 12.871105 | 12.396052 |
|                                  |           |           | 11.932649                        | 11.762391 | 12.553546 |

| Coordinates for Co <sub>29</sub> |           |           | Coordinates for Co <sub>30</sub> |           |           |
|----------------------------------|-----------|-----------|----------------------------------|-----------|-----------|
| X                                | Y         | Z         | X                                | Y         | Z         |
| 9.411341                         | 9.829375  | 6.130424  | 10.569555                        | 9.680683  | 6.097359  |
| 12.573999                        | 10.702613 | 8.682542  | 9.751521                         | 11.074064 | 10.567431 |
| 10.608420                        | 11.415822 | 7.469690  | 10.319318                        | 11.921605 | 6.585918  |
| 11.778126                        | 12.979423 | 8.849322  | 12.047658                        | 11.766076 | 8.191812  |
| 11.371166                        | 9.171333  | 7.286907  | 12.271901                        | 9.446563  | 7.702841  |
| 10.147789                        | 7.375946  | 8.262140  | 9.979889                         | 8.686936  | 10.038039 |
| 9.372291                         | 12.935131 | 8.869219  | 9.935938                         | 12.691598 | 8.798500  |
| 8.230082                         | 11.395404 | 7.470807  | 8.222425                         | 11.527695 | 7.598084  |
| 6.954271                         | 9.386525  | 10.796782 | 8.343662                         | 9.413912  | 11.736345 |

|           |           |           |           |           |           |
|-----------|-----------|-----------|-----------|-----------|-----------|
| 8.226070  | 8.089911  | 7.075281  | 10.367381 | 8.007544  | 7.781031  |
| 12.562525 | 11.867267 | 10.822309 | 10.585387 | 11.901073 | 12.588754 |
| 8.136221  | 11.196562 | 9.864840  | 8.465843  | 9.239649  | 7.063428  |
| 8.144829  | 9.675712  | 12.841533 | 7.922929  | 9.882379  | 9.325845  |
| 7.019219  | 9.618383  | 8.436065  | 6.533200  | 10.671115 | 10.980499 |
| 13.385532 | 9.666173  | 10.631763 | 12.918953 | 8.638428  | 11.512882 |
| 10.570790 | 13.235972 | 10.907641 | 11.659520 | 12.452612 | 10.466346 |
| 10.139290 | 10.383240 | 13.836179 | 8.244412  | 7.625615  | 8.822050  |
| 8.125955  | 7.772639  | 9.448624  | 8.622644  | 7.152343  | 11.147699 |
| 9.369432  | 9.587916  | 8.450347  | 12.097708 | 7.818782  | 9.457765  |
| 8.047596  | 7.504621  | 11.823172 | 10.158750 | 10.349257 | 8.282033  |
| 10.109597 | 8.267431  | 12.777698 | 9.444374  | 7.957580  | 13.204091 |
| 10.116841 | 7.096569  | 10.641303 | 10.178351 | 6.370101  | 9.500730  |
| 11.383000 | 12.208467 | 12.844736 | 10.860053 | 9.558004  | 12.202824 |
| 11.416724 | 10.052563 | 11.873970 | 9.223006  | 10.314506 | 13.721063 |
| 10.583003 | 11.175762 | 9.836007  | 10.995595 | 7.261613  | 11.565429 |
| 9.362292  | 11.475200 | 11.915847 | 7.816060  | 12.230760 | 9.836600  |
| 12.123006 | 7.813330  | 11.638206 | 9.537788  | 13.419741 | 11.041078 |
| 9.295541  | 9.286325  | 10.862327 | 12.706020 | 11.021919 | 12.031336 |
| 11.435051 | 8.834385  | 9.654317  | 8.204540  | 11.766784 | 12.175578 |
|           |           |           | 12.015620 | 10.151064 | 9.976609  |

| Coordinates for Co <sub>31</sub> |           |           | Coordinates for Co <sub>32</sub> |           |           |
|----------------------------------|-----------|-----------|----------------------------------|-----------|-----------|
| X                                | Y         | Z         | X                                | Y         | Z         |
| 10.792974                        | 9.961397  | 6.448988  | 10.539320                        | 10.494611 | 6.863168  |
| 10.148731                        | 11.856446 | 12.465032 | 8.384863                         | 11.383798 | 12.582338 |
| 9.187631                         | 11.579605 | 7.221038  | 8.652953                         | 11.937177 | 6.915043  |
| 11.502523                        | 11.722197 | 7.921212  | 12.607082                        | 11.307467 | 7.824513  |
| 12.350376                        | 9.492788  | 8.202423  | 11.974393                        | 9.018190  | 8.125941  |
| 7.787836                         | 9.239659  | 9.363369  | 11.325055                        | 6.765000  | 8.489595  |
| 9.931350                         | 13.350407 | 8.603753  | 10.647660                        | 12.702589 | 7.904291  |
| 7.021262                         | 10.843423 | 7.820701  | 6.741848                         | 11.350781 | 8.317914  |
| 7.237640                         | 9.364055  | 11.686022 | 9.139206                         | 9.111069  | 12.728077 |
| 10.560241                        | 7.956398  | 7.751730  | 9.957624                         | 8.180020  | 7.153024  |
| 7.825808                         | 11.714651 | 11.791812 | 10.207234                        | 12.066793 | 11.273644 |
| 8.599463                         | 9.229009  | 7.115247  | 8.586928                         | 9.923625  | 8.102430  |
| 6.328449                         | 10.912126 | 10.146034 | 6.815380                         | 9.368666  | 9.594005  |
| 11.666812                        | 9.559993  | 10.509613 | 6.911653                         | 9.567730  | 11.988016 |
| 13.205447                        | 9.099586  | 12.185156 | 13.190917                        | 9.229653  | 12.081996 |
| 10.873748                        | 11.932432 | 10.203231 | 12.099856                        | 12.532683 | 9.857799  |
| 8.394073                         | 7.206729  | 8.327252  | 8.074474                         | 7.615657  | 8.520888  |
| 7.695839                         | 7.275970  | 10.670782 | 8.175097                         | 7.845683  | 10.891928 |
| 12.164854                        | 7.484279  | 9.478932  | 12.284436                        | 7.970515  | 10.285259 |
| 10.062985                        | 10.040617 | 8.747331  | 12.931785                        | 10.275579 | 9.966207  |

|           |           |           |           |           |           |
|-----------|-----------|-----------|-----------|-----------|-----------|
| 9.206449  | 8.090648  | 12.295549 | 8.715802  | 12.206062 | 9.255325  |
| 9.858322  | 7.874315  | 10.020593 | 10.050847 | 8.438610  | 9.475995  |
| 10.976203 | 9.629058  | 12.814648 | 11.034353 | 9.722920  | 11.364499 |
| 8.721239  | 10.166842 | 13.402487 | 10.601593 | 10.881537 | 13.347906 |
| 11.486530 | 7.551545  | 11.755635 | 10.434955 | 7.394507  | 11.615716 |
| 9.368343  | 10.109502 | 11.078802 | 8.763307  | 10.167915 | 10.606315 |
| 9.233116  | 13.419648 | 10.947282 | 10.216978 | 13.886363 | 9.859894  |
| 12.425464 | 11.303964 | 11.924516 | 12.444893 | 11.487488 | 11.975085 |
| 8.418901  | 11.761691 | 9.476875  | 6.920013  | 11.559316 | 10.655489 |
| 13.863604 | 9.034319  | 9.976141  | 10.698250 | 10.770019 | 9.186559  |
| 13.103788 | 11.236698 | 9.647812  | 9.495771  | 6.202908  | 9.797808  |
|           |           |           | 11.375474 | 8.635068  | 13.393332 |

| Coordinates for Co <sub>33</sub> |           |           | Coordinates for Co <sub>34</sub> |           |           |
|----------------------------------|-----------|-----------|----------------------------------|-----------|-----------|
| X                                | Y         | Z         | X                                | Y         | Z         |
| 9.564819                         | 11.406635 | 7.107066  | 9.620168                         | 11.688117 | 6.998526  |
| 9.272766                         | 9.079227  | 6.531698  | 9.338263                         | 9.367826  | 6.410185  |
| 11.495905                        | 9.922628  | 6.904775  | 11.560097                        | 10.156751 | 6.910601  |
| 10.046740                        | 9.768047  | 8.712236  | 9.971997                         | 10.044641 | 8.604640  |
| 11.767146                        | 12.220691 | 7.391660  | 11.479794                        | 8.670816  | 9.941399  |
| 7.990678                         | 12.457087 | 8.595350  | 7.989051                         | 12.726141 | 8.419193  |
| 10.307885                        | 12.219211 | 9.216711  | 10.277156                        | 12.428064 | 9.137193  |
| 12.261120                        | 9.082019  | 12.140495 | 12.879503                        | 7.317581  | 11.205283 |
| 10.833053                        | 7.752135  | 7.811349  | 10.821497                        | 8.000575  | 7.712896  |
| 11.461191                        | 11.117194 | 13.165851 | 11.219346                        | 11.363306 | 13.158654 |
| 10.044322                        | 6.539376  | 9.735790  | 9.969523                         | 6.807850  | 9.642369  |
| 11.664944                        | 8.308754  | 9.970320  | 12.264764                        | 6.668659  | 9.065199  |
| 10.992886                        | 12.736520 | 11.436213 | 10.852210                        | 12.997551 | 11.408855 |
| 10.764102                        | 7.209670  | 11.917784 | 10.587003                        | 7.456737  | 11.828789 |
| 9.287211                         | 8.543684  | 10.682500 | 9.104003                         | 8.832824  | 10.559613 |
| 12.503680                        | 12.906588 | 9.624446  | 12.078391                        | 9.322892  | 12.199999 |
| 9.981176                         | 9.248383  | 12.887667 | 10.621559                        | 10.735013 | 10.912218 |
| 8.490368                         | 7.424874  | 12.559965 | 8.273906                         | 7.675744  | 12.397354 |
| 10.783480                        | 10.454135 | 10.945644 | 12.793995                        | 11.464720 | 11.320846 |
| 13.032339                        | 8.574952  | 8.094254  | 13.023888                        | 8.751676  | 8.190996  |
| 7.708503                         | 9.620891  | 12.159219 | 7.495991                         | 9.896760  | 11.968885 |
| 6.267780                         | 11.172311 | 9.600113  | 6.189347                         | 11.464550 | 9.340559  |
| 8.483473                         | 10.859711 | 10.236163 | 8.364232                         | 11.130218 | 10.082607 |
| 12.342592                        | 10.626920 | 9.034658  | 12.246685                        | 10.873332 | 9.047926  |
| 8.710458                         | 13.127381 | 10.777344 | 8.626937                         | 13.388578 | 10.619703 |
| 8.527784                         | 7.894914  | 8.481746  | 8.470476                         | 8.159343  | 8.311654  |
| 13.768874                        | 9.260849  | 10.327040 | 13.643035                        | 9.428906  | 10.392355 |
| 7.793482                         | 6.775900  | 10.447374 | 7.666036                         | 7.029288  | 10.244792 |
| 9.200760                         | 11.497203 | 12.454283 | 8.985614                         | 11.764308 | 12.340175 |

|           |           |           |           |           |           |
|-----------|-----------|-----------|-----------|-----------|-----------|
| 12.935572 | 11.263316 | 11.269088 | 12.425396 | 13.089400 | 9.705369  |
| 7.002877  | 8.963778  | 10.020131 | 6.886088  | 9.241892  | 9.782122  |
| 7.747368  | 10.143734 | 8.048361  | 7.740650  | 10.432574 | 7.852531  |
| 6.964666  | 11.821285 | 11.712705 | 6.797333  | 12.118803 | 11.480950 |
|           |           |           | 9.736064  | 9.504563  | 12.805566 |

| Coordinates for Co <sub>35</sub> |           |           | Coordinates for Co <sub>36</sub> |           |           |
|----------------------------------|-----------|-----------|----------------------------------|-----------|-----------|
| X                                | Y         | Z         | X                                | Y         | Z         |
| 9.428917                         | 11.525986 | 7.049347  | 9.440539                         | 11.436919 | 7.050542  |
| 9.159309                         | 9.185817  | 6.522231  | 9.157988                         | 9.120900  | 6.508652  |
| 11.387454                        | 10.020952 | 6.928249  | 11.393764                        | 9.958483  | 6.944200  |
| 9.878770                         | 9.947122  | 8.696517  | 9.867842                         | 9.821856  | 8.696546  |
| 11.630178                        | 12.335379 | 7.340493  | 11.650112                        | 12.269412 | 7.397390  |
| 7.831848                         | 12.593769 | 8.503430  | 7.858767                         | 12.528795 | 8.553315  |
| 10.146347                        | 12.386899 | 9.155717  | 10.140963                        | 12.204649 | 9.171516  |
| 12.118068                        | 9.341254  | 12.211262 | 12.104409                        | 9.169078  | 12.208146 |
| 10.717691                        | 7.872540  | 7.816271  | 10.707652                        | 7.778791  | 7.782662  |
| 11.269706                        | 11.399199 | 13.145572 | 11.266036                        | 11.203997 | 13.188313 |
| 9.958452                         | 6.729870  | 9.806021  | 9.927913                         | 6.607191  | 9.746524  |
| 11.455538                        | 8.619050  | 9.997706  | 11.442369                        | 8.483823  | 9.981184  |
| 10.806529                        | 12.970824 | 11.372892 | 10.813103                        | 12.835949 | 11.466452 |
| 10.641319                        | 7.446061  | 11.949156 | 10.623121                        | 7.279211  | 11.903269 |
| 9.095321                         | 8.766354  | 10.700517 | 9.070279                         | 8.622243  | 10.684285 |
| 12.344363                        | 13.084416 | 9.581916  | 12.296709                        | 13.017590 | 9.632727  |
| 9.799948                         | 9.506532  | 12.897468 | 9.782290                         | 9.315393  | 12.895038 |
| 8.348161                         | 7.641511  | 12.596396 | 8.324466                         | 7.458469  | 12.552461 |
| 10.593025                        | 10.696232 | 10.938159 | 10.580569                        | 10.536614 | 10.964312 |
| 12.935911                        | 8.671562  | 8.187841  | 12.925351                        | 8.564745  | 8.178157  |
| 7.526077                         | 9.839963  | 12.141775 | 7.506711                         | 9.677721  | 12.143396 |
| 6.093961                         | 11.325524 | 9.524007  | 6.105746                         | 11.266182 | 9.543313  |
| 8.298275                         | 11.045243 | 10.192923 | 8.283682                         | 10.903068 | 10.224489 |
| 12.198184                        | 10.810169 | 9.028850  | 12.196856                        | 10.694392 | 9.058015  |
| 8.525536                         | 13.321308 | 10.680522 | 8.544927                         | 13.190241 | 10.735719 |
| 8.398093                         | 8.036267  | 8.497836  | 8.373479                         | 7.946939  | 8.463577  |
| 13.629598                        | 9.399100  | 10.364933 | 13.616965                        | 9.268537  | 10.369306 |
| 7.674809                         | 6.935299  | 10.483124 | 7.637162                         | 6.810383  | 10.424577 |
| 8.997576                         | 11.739190 | 12.404205 | 8.987955                         | 11.558440 | 12.456945 |
| 12.765066                        | 11.465790 | 11.251794 | 12.748898                        | 11.325770 | 11.284975 |
| 6.843209                         | 9.123772  | 9.998639  | 6.821543                         | 9.019733  | 9.973921  |
| 7.597199                         | 10.270476 | 8.009214  | 7.598741                         | 10.209006 | 8.014018  |
| 6.765056                         | 12.029367 | 11.630192 | 6.760146                         | 11.896500 | 11.684230 |
| 12.234706                        | 6.606680  | 9.144319  | 12.208976                        | 6.479522  | 9.096733  |
| 12.905800                        | 7.310523  | 11.250504 | 12.891771                        | 7.152622  | 11.208529 |
|                                  |           |           | 10.342202                        | 14.386839 | 9.812567  |

| Coordinates for Co <sub>37</sub> |           |           | Coordinates for Co <sub>38</sub> |           |           |
|----------------------------------|-----------|-----------|----------------------------------|-----------|-----------|
| X                                | Y         | Z         | X                                | Y         | Z         |
| 9.675391                         | 11.683908 | 7.236193  | 9.539913                         | 11.585254 | 6.862183  |
| 9.391092                         | 9.430505  | 6.418174  | 9.157338                         | 9.229882  | 6.449804  |
| 11.604388                        | 10.182887 | 7.093297  | 11.426758                        | 10.037694 | 6.681531  |
| 8.455475                         | 8.053828  | 8.181254  | 10.001276                        | 10.024666 | 8.530167  |
| 11.829611                        | 12.459937 | 7.869248  | 11.768166                        | 12.350919 | 6.999942  |
| 8.032879                         | 12.617680 | 8.754240  | 8.071261                         | 12.753180 | 8.372661  |
| 10.247006                        | 12.110905 | 9.562275  | 10.403320                        | 12.459935 | 8.917214  |
| 11.936749                        | 8.762273  | 12.301431 | 12.492969                        | 9.525119  | 11.942192 |
| 10.830940                        | 7.924533  | 7.637476  | 10.774050                        | 7.934299  | 7.687806  |
| 11.058967                        | 10.694055 | 13.452745 | 11.748631                        | 11.628064 | 12.863346 |
| 9.898092                         | 6.549536  | 9.401964  | 10.121362                        | 6.830110  | 9.750452  |
| 11.404225                        | 8.346096  | 9.964137  | 13.196191                        | 7.440847  | 11.000389 |
| 9.937843                         | 13.906975 | 8.099685  | 11.233453                        | 13.152586 | 11.053755 |
| 10.439155                        | 6.959434  | 11.683995 | 10.980747                        | 7.625450  | 11.877460 |
| 8.991042                         | 8.454319  | 10.516856 | 9.418105                         | 5.898654  | 11.768700 |
| 12.376394                        | 12.874170 | 10.175408 | 12.640436                        | 13.158184 | 9.158840  |
| 9.559634                         | 8.890318  | 12.838250 | 10.229012                        | 9.764677  | 12.788138 |
| 8.092010                         | 7.111428  | 12.191927 | 8.683390                         | 7.897025  | 12.677180 |
| 12.690659                        | 11.005825 | 11.674844 | 10.906724                        | 10.862638 | 10.771185 |
| 13.010896                        | 8.616835  | 8.279468  | 13.017484                        | 8.701758  | 7.896469  |
| 7.357869                         | 9.399235  | 11.980183 | 7.888290                         | 10.155377 | 12.206742 |
| 6.150412                         | 11.295086 | 9.459398  | 6.325507                         | 11.601021 | 9.547185  |
| 8.273531                         | 10.788615 | 10.267689 | 8.567751                         | 11.253668 | 10.109901 |
| 10.533349                        | 10.289350 | 11.174894 | 12.349028                        | 10.865402 | 8.727316  |
| 8.573941                         | 13.027579 | 11.036271 | 8.925264                         | 13.543540 | 10.486348 |
| 9.943777                         | 9.842701  | 8.688262  | 8.497190                         | 8.161917  | 8.501818  |
| 13.557679                        | 9.031068  | 10.585628 | 13.866943                        | 9.487913  | 9.998910  |
| 7.560213                         | 6.708548  | 9.948974  | 7.840713                         | 7.117148  | 10.591526 |
| 8.849592                         | 11.200313 | 12.591677 | 9.454506                         | 12.023595 | 12.247901 |
| 12.252028                        | 10.623279 | 9.354098  | 13.118421                        | 11.603288 | 10.868455 |
| 6.815124                         | 8.988062  | 9.691056  | 7.012891                         | 9.345215  | 10.040099 |
| 7.745433                         | 10.363823 | 7.934681  | 7.727955                         | 10.425712 | 7.974626  |
| 6.682210                         | 11.697965 | 11.702352 | 7.155723                         | 12.369366 | 11.601998 |
| 12.233111                        | 6.439723  | 8.896753  | 12.368422                        | 6.674767  | 8.951632  |
| 12.761675                        | 6.840153  | 11.126069 | 11.655023                        | 8.728713  | 9.806679  |
| 10.466407                        | 14.307405 | 10.329001 | 5.660827                         | 10.539321 | 11.551511 |
| 10.781200                        | 12.521648 | 11.900148 | 9.339948                         | 8.936717  | 10.664272 |
|                                  |           |           | 6.435012                         | 8.306378  | 12.073666 |

| Coordinates for Co <sub>39</sub> |           |           | Coordinates for Co <sub>40</sub> |           |           |
|----------------------------------|-----------|-----------|----------------------------------|-----------|-----------|
| X                                | Y         | Z         | X                                | Y         | Z         |
| 8.809662                         | 11.401265 | 7.388218  | 8.937524                         | 11.447831 | 7.297272  |
| 8.119915                         | 9.115211  | 6.968091  | 8.228621                         | 9.168221  | 6.873802  |
| 12.790558                        | 10.267000 | 6.781550  | 12.914490                        | 10.281046 | 6.727966  |
| 10.471970                        | 9.692772  | 6.856004  | 10.586374                        | 9.726036  | 6.785255  |
| 11.157028                        | 11.978230 | 7.263401  | 11.288145                        | 12.001525 | 7.197135  |
| 7.758748                         | 12.652444 | 9.173919  | 7.888443                         | 12.710784 | 9.067111  |
| 10.051121                        | 12.008024 | 9.382307  | 10.167869                        | 12.048091 | 9.308328  |
| 12.248937                        | 8.769772  | 11.905432 | 12.322842                        | 8.804417  | 11.862706 |
| 9.767179                         | 7.601828  | 7.903236  | 9.856243                         | 7.643680  | 7.827035  |
| 11.880085                        | 10.884789 | 13.031909 | 11.962323                        | 10.925234 | 12.982614 |
| 9.309785                         | 6.497912  | 10.008172 | 9.379271                         | 6.546182  | 9.926162  |
| 12.587433                        | 6.694151  | 10.770376 | 12.656593                        | 6.719765  | 10.730671 |
| 9.504934                         | 13.643910 | 7.833494  | 9.654005                         | 13.691775 | 7.740400  |
| 10.526476                        | 7.070501  | 11.970264 | 10.593546                        | 7.117598  | 11.912872 |
| 11.732510                        | 10.279920 | 8.843984  | 11.833233                        | 10.307326 | 8.791136  |
| 12.373719                        | 12.550819 | 9.225492  | 12.496764                        | 12.570280 | 9.174591  |
| 10.151044                        | 9.185991  | 13.084871 | 10.227152                        | 9.240377  | 13.033576 |
| 7.250931                         | 6.956834  | 11.182660 | 7.298249                         | 6.999061  | 11.090013 |
| 10.694859                        | 14.203903 | 9.752421  | 10.836915                        | 14.248432 | 9.675793  |
| 12.115622                        | 8.174520  | 7.778998  | 12.205670                        | 8.202320  | 7.728979  |
| 7.669285                         | 8.018047  | 9.082675  | 7.747646                         | 8.073566  | 8.976788  |
| 6.081256                         | 11.598116 | 10.553529 | 6.182622                         | 11.686931 | 10.428174 |
| 8.299085                         | 10.961107 | 10.774260 | 8.396118                         | 11.032714 | 10.683263 |
| 13.980483                        | 10.826991 | 8.700477  | 14.097921                        | 10.837948 | 8.664209  |
| 8.975439                         | 13.225033 | 11.136010 | 9.100355                         | 13.281089 | 11.049955 |
| 8.897655                         | 8.585973  | 11.096212 | 8.967320                         | 8.634141  | 11.024021 |
| 13.332313                        | 8.747109  | 9.741090  | 13.414366                        | 8.771111  | 9.706559  |
| 10.647029                        | 10.304499 | 11.043429 | 10.748303                        | 10.353043 | 11.015193 |
| 11.291420                        | 12.569209 | 11.390414 | 11.401719                        | 12.607437 | 11.329010 |
| 12.953729                        | 10.860715 | 10.858200 | 13.050118                        | 10.885429 | 10.816254 |
| 6.617089                         | 9.265422  | 10.870281 | 6.667060                         | 9.343475  | 10.757929 |
| 7.077507                         | 10.366229 | 8.764376  | 7.180290                         | 10.437707 | 8.651903  |
| 7.271181                         | 12.158108 | 12.472456 | 7.374401                         | 12.247760 | 12.378076 |
| 11.397508                        | 6.134159  | 8.851449  | 11.472278                        | 6.162448  | 8.792980  |
| 11.019629                        | 8.164976  | 9.903236  | 11.095427                        | 8.203462  | 9.847195  |
| 8.440856                         | 7.516827  | 13.101587 | 8.493900                         | 7.561712  | 13.046250 |
| 9.352971                         | 9.695501  | 8.956571  | 9.427017                         | 9.731270  | 8.853402  |
| 7.833780                         | 9.838011  | 12.832372 | 7.899281                         | 9.923336  | 12.773999 |
| 9.559266                         | 11.534172 | 12.766572 | 9.652812                         | 11.601231 | 12.697265 |
|                                  |           |           | 6.296776                         | 8.224209  | 12.774160 |

| Coordinates for Co <sub>41</sub> |           |           | Coordinates for Co <sub>42</sub> |           |           |
|----------------------------------|-----------|-----------|----------------------------------|-----------|-----------|
| X                                | Y         | Z         | X                                | Y         | Z         |
| 8.938875                         | 11.364044 | 7.433487  | 9.067664                         | 11.344172 | 7.370436  |
| 8.158785                         | 9.135606  | 6.915073  | 8.264480                         | 9.122502  | 6.860586  |
| 12.913132                        | 9.969354  | 7.107845  | 13.025293                        | 9.906500  | 7.059907  |
| 10.540244                        | 9.543766  | 6.987762  | 10.649223                        | 9.507728  | 6.939965  |
| 11.335820                        | 11.795880 | 7.465121  | 11.469280                        | 11.751782 | 7.403530  |
| 7.841977                         | 12.644987 | 9.176245  | 7.984791                         | 12.656135 | 9.096852  |
| 10.825780                        | 14.021082 | 10.028679 | 10.980392                        | 13.994120 | 9.951740  |
| 11.862450                        | 8.435112  | 12.163717 | 11.954625                        | 8.413199  | 12.115243 |
| 10.071524                        | 11.868013 | 9.548904  | 10.200154                        | 11.844822 | 9.485925  |
| 9.297409                         | 11.350795 | 12.877671 | 9.426682                         | 11.362448 | 12.823466 |
| 8.939163                         | 6.400689  | 9.984119  | 9.019773                         | 6.392097  | 9.942025  |
| 12.151655                        | 6.352844  | 11.012432 | 12.229027                        | 6.321880  | 10.972497 |
| 9.745483                         | 13.570023 | 7.989528  | 9.898959                         | 13.543912 | 7.915061  |
| 10.034150                        | 6.857882  | 12.050999 | 10.117784                        | 6.849206  | 12.009925 |
| 11.697386                        | 10.019895 | 9.096362  | 11.802267                        | 9.982240  | 9.046960  |
| 12.475344                        | 12.271669 | 9.616069  | 12.609664                        | 12.226532 | 9.551231  |
| 9.713056                         | 8.968352  | 13.182188 | 9.816235                         | 8.967135  | 13.134873 |
| 6.829155                         | 6.964244  | 11.005610 | 6.917525                         | 6.976102  | 10.951608 |
| 12.069999                        | 13.957237 | 8.028021  | 12.227276                        | 13.907421 | 7.953628  |
| 12.007556                        | 7.909970  | 8.016798  | 12.102481                        | 7.864017  | 7.975863  |
| 7.480160                         | 8.036045  | 8.967410  | 7.574713                         | 8.033974  | 8.913383  |
| 6.001981                         | 11.676584 | 10.401620 | 6.117594                         | 11.723685 | 10.321815 |
| 8.166844                         | 10.899672 | 10.772158 | 8.277707                         | 10.910099 | 10.713324 |
| 13.993429                        | 10.420414 | 9.146996  | 14.106078                        | 10.356437 | 9.095364  |
| 9.264230                         | 9.603813  | 8.974550  | 9.364740                         | 9.590259  | 8.926077  |
| 8.588193                         | 8.493217  | 11.081244 | 8.686626                         | 8.487622  | 11.031685 |
| 13.108840                        | 8.369793  | 10.095564 | 13.203637                        | 8.322435  | 10.049686 |
| 8.943260                         | 13.104810 | 11.255011 | 9.090830                         | 13.116586 | 11.179871 |
| 11.191674                        | 12.304662 | 11.685835 | 11.323950                        | 12.283480 | 11.619732 |
| 12.793044                        | 10.484384 | 11.240110 | 12.902831                        | 10.445920 | 11.184216 |
| 6.377573                         | 9.312450  | 10.697112 | 6.448865                         | 9.319349  | 10.635118 |
| 7.062699                         | 10.417730 | 8.659466  | 7.176197                         | 10.425556 | 8.585095  |
| 7.074277                         | 12.124303 | 12.425669 | 7.201765                         | 12.175033 | 12.363651 |
| 11.079360                        | 5.905125  | 8.988384  | 11.157324                        | 5.875722  | 8.954143  |
| 10.758663                        | 7.953551  | 10.050751 | 10.846118                        | 7.933764  | 10.007471 |
| 7.901579                         | 7.412016  | 13.029899 | 7.997638                         | 7.425761  | 12.985801 |
| 9.627739                         | 7.502046  | 7.945513  | 9.718400                         | 7.482243  | 7.903729  |
| 7.472559                         | 9.769643  | 12.763992 | 7.566774                         | 9.784742  | 12.740492 |
| 10.461879                        | 10.103871 | 11.235213 | 10.563156                        | 10.089168 | 11.183072 |
| 11.546864                        | 10.550241 | 13.310358 | 11.659827                        | 10.536008 | 13.255092 |

13.656212 12.154188 7.586515 13.792852 12.085190 7.525144  
5.458805 10.663015 12.264719

| Coordinates for Co <sub>43</sub> |           |           | Coordinates for Co <sub>44</sub> |           |           |
|----------------------------------|-----------|-----------|----------------------------------|-----------|-----------|
| X                                | Y         | Z         | X                                | Y         | Z         |
| 8.107428                         | 11.203161 | 7.502797  | 10.251249                        | 6.625630  | 8.769104  |
| 7.750479                         | 8.816545  | 7.109636  | 12.235515                        | 6.808535  | 10.303136 |
| 12.171022                        | 10.743741 | 6.433813  | 13.452827                        | 8.269280  | 11.891378 |
| 9.966754                         | 9.782338  | 6.756633  | 12.465713                        | 12.245703 | 7.314502  |
| 10.319498                        | 12.161943 | 7.156735  | 8.079408                         | 13.954524 | 8.728154  |
| 7.072307                         | 12.263242 | 9.432750  | 10.019003                        | 14.153985 | 10.229525 |
| 9.434868                         | 11.967687 | 9.357456  | 13.452378                        | 12.257613 | 11.421393 |
| 13.580906                        | 8.130472  | 11.717772 | 6.822069                         | 9.881568  | 8.234497  |
| 9.729649                         | 7.584761  | 7.840963  | 11.024744                        | 12.287827 | 11.420219 |
| 11.302549                        | 8.650008  | 12.189856 | 12.450032                        | 7.319546  | 7.898276  |
| 9.648825                         | 12.361944 | 11.815425 | 8.043301                         | 6.024302  | 9.695142  |
| 11.912519                        | 6.654782  | 10.992270 | 10.023173                        | 10.185278 | 10.894576 |
| 8.491121                         | 13.573726 | 7.945491  | 9.062052                         | 12.030211 | 9.795921  |
| 9.935681                         | 6.714229  | 12.376633 | 8.206455                         | 7.802591  | 8.008993  |
| 11.277081                        | 10.547989 | 8.608408  | 10.006068                        | 6.119188  | 11.171518 |
| 12.536357                        | 12.436728 | 8.139339  | 9.051940                         | 8.122681  | 10.307781 |
| 9.403262                         | 10.085980 | 12.938432 | 12.352924                        | 10.188449 | 10.965590 |
| 7.730395                         | 6.523059  | 11.424435 | 10.896773                        | 10.401918 | 13.075256 |
| 10.703408                        | 13.829794 | 8.865668  | 9.591317                         | 7.088873  | 13.335993 |
| 11.930013                        | 8.546982  | 7.477241  | 11.218262                        | 8.757818  | 9.382717  |
| 7.723833                         | 7.647864  | 9.257053  | 8.219565                         | 11.821562 | 7.510017  |
| 5.710106                         | 10.942677 | 10.972442 | 6.383546                         | 11.579478 | 11.837118 |
| 8.048213                         | 10.646264 | 10.882974 | 6.651648                         | 12.064221 | 9.420022  |
| 13.562205                        | 10.149347 | 8.343375  | 6.329985                         | 9.085100  | 12.128144 |
| 8.618331                         | 13.902952 | 10.313306 | 10.431907                        | 8.459776  | 7.084179  |
| 9.052541                         | 8.424147  | 11.105911 | 7.671723                         | 7.027172  | 11.899793 |
| 13.329912                        | 7.996379  | 9.405694  | 6.632397                         | 8.046023  | 9.898847  |
| 11.605250                        | 11.109255 | 12.599106 | 8.397451                         | 9.640383  | 6.365692  |
| 11.696261                        | 12.299065 | 10.389337 | 14.761180                        | 10.200535 | 11.132590 |
| 13.981628                        | 11.844509 | 9.885190  | 10.277892                        | 13.141926 | 7.985995  |
| 6.689379                         | 8.714130  | 11.183955 | 5.320448                         | 10.127747 | 10.160807 |
| 6.714078                         | 9.883637  | 9.045653  | 12.482318                        | 9.777518  | 7.562729  |
| 7.251513                         | 12.613369 | 11.828763 | 9.221061                         | 9.903392  | 8.614440  |
| 11.041123                        | 8.361051  | 9.687488  | 13.651039                        | 8.743785  | 9.490338  |
| 11.700349                        | 6.381379  | 8.586292  | 7.705557                         | 10.145001 | 10.498577 |
| 7.999512                         | 8.167517  | 13.143287 | 12.243056                        | 13.299761 | 9.542151  |
| 9.046579                         | 9.568464  | 8.916938  | 10.438399                        | 10.952481 | 6.792879  |
| 7.008325                         | 10.359415 | 12.940910 | 7.749704                         | 13.507412 | 11.109967 |
| 12.751307                        | 10.048772 | 10.700460 | 11.037804                        | 8.254947  | 11.857719 |
| 8.416313                         | 12.024491 | 13.756674 | 11.226951                        | 11.202531 | 9.094014  |



|           |           |           |           |           |           |
|-----------|-----------|-----------|-----------|-----------|-----------|
| 9.700669  | 6.426422  | 9.986759  | 8.705581  | 9.180435  | 12.595957 |
| 14.934634 | 9.543382  | 10.153621 | 13.661002 | 11.232869 | 9.194069  |
| 10.413818 | 10.366399 | 10.833057 | 8.774198  | 11.648795 | 12.288526 |
|           |           |           | 13.320436 | 10.431532 | 13.091786 |

| Coordinates for Co <sub>45</sub> |           |           | Coordinates for Co <sub>46</sub> |           |           |
|----------------------------------|-----------|-----------|----------------------------------|-----------|-----------|
| X                                | Y         | Z         | X                                | Y         | Z         |
| 11.047884                        | 12.664264 | 8.403883  | 12.791647                        | 8.989090  | 10.821239 |
| 9.548602                         | 8.658385  | 6.483524  | 11.463143                        | 5.987546  | 9.621630  |
| 12.410375                        | 6.508647  | 9.490808  | 7.549345                         | 10.882465 | 7.803689  |
| 8.008666                         | 10.487668 | 7.021466  | 7.434608                         | 12.275716 | 11.599704 |
| 10.413178                        | 10.950298 | 6.761763  | 8.961773                         | 6.906542  | 12.781484 |
| 8.081035                         | 7.818129  | 10.896351 | 10.546544                        | 8.451311  | 6.590971  |
| 8.484930                         | 8.748977  | 8.623029  | 13.481168                        | 7.415381  | 9.105875  |
| 10.891171                        | 9.228021  | 8.340904  | 14.326478                        | 9.743034  | 9.097710  |
| 6.284241                         | 9.662293  | 8.560105  | 8.860270                         | 9.126300  | 11.955476 |
| 8.852449                         | 6.679989  | 7.664218  | 9.073139                         | 10.322938 | 5.961253  |
| 10.130679                        | 7.142920  | 9.611072  | 11.194790                        | 13.055230 | 12.760659 |
| 13.763501                        | 10.201569 | 9.938345  | 12.099428                        | 10.528091 | 8.904617  |
| 8.866182                         | 12.772594 | 7.295711  | 6.575690                         | 9.910408  | 11.607719 |
| 7.152933                         | 11.944221 | 8.831100  | 10.578006                        | 9.791901  | 10.518028 |
| 11.222237                        | 13.168202 | 10.796804 | 8.333103                         | 10.605723 | 10.089268 |
| 11.216903                        | 7.109450  | 7.480109  | 9.442071                         | 13.704700 | 11.150294 |
| 11.949341                        | 9.108210  | 6.254912  | 6.102209                         | 11.414501 | 9.714768  |
| 12.048929                        | 8.589907  | 10.413934 | 9.667051                         | 6.616116  | 8.051192  |
| 6.728950                         | 7.325342  | 9.007201  | 10.308979                        | 11.989960 | 9.665827  |
| 10.056253                        | 10.482739 | 14.327560 | 13.712790                        | 11.278140 | 7.291754  |
| 12.883482                        | 11.609839 | 11.789254 | 9.799242                         | 10.066920 | 8.236919  |
| 11.168698                        | 9.905259  | 12.379896 | 7.933883                         | 10.762210 | 13.508685 |
| 9.048307                         | 13.273245 | 9.693767  | 6.672873                         | 9.044948  | 9.267630  |
| 14.250624                        | 7.851429  | 10.389255 | 11.235142                        | 9.561128  | 12.787726 |
| 10.390785                        | 7.635249  | 11.984171 | 8.832478                         | 13.071535 | 13.457671 |
| 9.222503                         | 13.753603 | 12.077362 | 8.059332                         | 12.863136 | 9.254621  |
| 7.321841                         | 12.458033 | 11.220814 | 9.561153                         | 12.311249 | 7.357201  |
| 13.433548                        | 9.300502  | 12.183223 | 7.197268                         | 7.523551  | 11.171268 |
| 6.556005                         | 10.539937 | 12.474968 | 11.911629                        | 12.797215 | 8.030042  |
| 9.525859                         | 11.556012 | 11.304883 | 11.268926                        | 8.241289  | 8.912482  |
| 8.702295                         | 9.533161  | 12.597087 | 7.344741                         | 6.701014  | 8.857748  |
| 8.425302                         | 11.810596 | 13.312105 | 12.021547                        | 6.620960  | 7.307835  |
| 13.217814                        | 12.540162 | 9.530216  | 8.174694                         | 8.493086  | 7.370085  |
| 9.817818                         | 9.332101  | 10.504107 | 9.409235                         | 8.911608  | 14.250194 |
| 5.900496                         | 8.735243  | 10.762472 | 11.865484                        | 13.610013 | 10.426488 |
| 7.619996                         | 10.220887 | 10.452283 | 12.898069                        | 8.938101  | 7.237045  |
| 9.345792                         | 11.086359 | 8.866347  | 13.696110                        | 12.136259 | 9.600381  |
| 10.918799                        | 12.244821 | 13.054858 | 9.690747                         | 11.413128 | 11.947735 |

|           |           |           |           |           |           |
|-----------|-----------|-----------|-----------|-----------|-----------|
| 5.464152  | 11.095870 | 10.373289 | 12.174338 | 11.360491 | 11.325134 |
| 12.651395 | 6.983069  | 11.908678 | 7.141185  | 8.414256  | 13.473502 |
| 11.526939 | 10.965302 | 10.002148 | 11.405462 | 10.816520 | 6.582931  |
| 7.159278  | 8.210554  | 6.789413  | 8.959376  | 8.273575  | 9.678437  |
| 12.586661 | 10.839275 | 7.880832  | 10.797467 | 7.569446  | 11.338218 |
| 12.566656 | 10.790212 | 13.972160 | 10.077957 | 14.227172 | 8.832254  |
| 13.136518 | 8.477453  | 8.293612  | 9.115214  | 6.036862  | 10.452232 |
|           |           |           | 10.254270 | 11.239312 | 14.242478 |

| Coordinates for Co <sub>47</sub> |           |           | Coordinates for Co <sub>48</sub> |           |           |
|----------------------------------|-----------|-----------|----------------------------------|-----------|-----------|
| X                                | Y         | Z         | X                                | Y         | Z         |
| 11.003752                        | 12.757042 | 8.245066  | 10.963986                        | 12.764995 | 8.104493  |
| 9.502241                         | 8.764559  | 6.313616  | 9.431591                         | 8.615141  | 6.549783  |
| 12.374044                        | 6.584562  | 9.298854  | 12.375841                        | 6.661113  | 9.629652  |
| 7.960178                         | 10.594228 | 6.864678  | 7.891781                         | 10.470405 | 6.981586  |
| 10.363507                        | 11.047379 | 6.597155  | 10.299030                        | 10.912587 | 6.614955  |
| 8.056935                         | 7.875888  | 10.715369 | 10.148607                        | 7.338892  | 9.847541  |
| 8.449293                         | 8.862564  | 8.449714  | 8.446629                         | 8.899111  | 8.706273  |
| 10.845940                        | 9.327080  | 8.169946  | 10.816999                        | 9.331520  | 8.322063  |
| 6.251057                         | 9.761000  | 8.403245  | 6.244849                         | 9.765565  | 8.612996  |
| 8.787225                         | 6.791913  | 7.481669  | 8.780331                         | 6.707831  | 7.934986  |
| 10.094934                        | 7.232420  | 9.415206  | 10.424387                        | 5.281824  | 8.851498  |
| 13.712128                        | 10.265513 | 9.759973  | 13.721806                        | 10.399365 | 9.756529  |
| 8.815483                         | 12.867368 | 7.153758  | 8.745799                         | 12.768147 | 7.078526  |
| 7.118003                         | 12.032755 | 8.702128  | 7.082869                         | 12.057152 | 8.710284  |
| 11.191884                        | 13.231972 | 10.653586 | 11.205960                        | 13.448922 | 10.457785 |
| 11.166446                        | 7.202992  | 7.291459  | 11.144752                        | 7.133323  | 7.594420  |
| 11.890778                        | 9.203703  | 6.076514  | 11.821003                        | 9.056873  | 6.220595  |
| 11.998206                        | 8.657607  | 10.236210 | 12.017167                        | 8.845722  | 10.404743 |
| 6.692953                         | 7.422543  | 8.820955  | 6.749115                         | 7.398389  | 9.212920  |
| 10.167969                        | 10.347153 | 14.144613 | 10.302404                        | 10.925812 | 14.211252 |
| 12.869400                        | 11.702340 | 11.599560 | 12.926589                        | 12.011715 | 11.491652 |
| 11.161528                        | 10.092957 | 12.066351 | 11.225543                        | 10.436244 | 12.148810 |
| 9.011010                         | 13.357264 | 9.553695  | 9.000751                         | 13.477614 | 9.404999  |
| 14.213435                        | 7.919559  | 10.183233 | 14.218914                        | 8.066933  | 10.375954 |
| 10.339651                        | 7.708449  | 11.850334 | 11.941845                        | 8.981766  | 13.784746 |
| 9.198312                         | 13.800409 | 11.959883 | 9.247369                         | 14.116245 | 11.737848 |
| 7.307580                         | 12.517620 | 11.102481 | 7.338909                         | 12.750672 | 11.046593 |
| 13.426760                        | 9.361999  | 12.006308 | 13.473299                        | 9.688742  | 12.078254 |
| 6.546141                         | 10.605042 | 12.314343 | 6.640714                         | 10.955623 | 12.441643 |
| 9.492752                         | 11.635984 | 11.120462 | 9.531573                         | 11.880659 | 11.097330 |
| 8.666651                         | 9.556274  | 12.442284 | 8.799975                         | 9.971922  | 12.607170 |
| 8.465742                         | 11.815116 | 13.186660 | 8.561054                         | 12.266153 | 13.179405 |
| 13.180859                        | 12.616676 | 9.352360  | 13.173213                        | 12.705630 | 9.169193  |
| 9.769637                         | 9.400899  | 10.313923 | 10.366260                        | 8.109922  | 12.195014 |

|           |           |           |           |           |           |
|-----------|-----------|-----------|-----------|-----------|-----------|
| 5.868505  | 8.818128  | 10.585205 | 5.910015  | 8.986289  | 10.839663 |
| 7.603431  | 10.301294 | 10.280447 | 7.630234  | 10.472117 | 10.411822 |
| 9.308876  | 11.177691 | 8.705132  | 9.288594  | 11.218278 | 8.737596  |
| 10.883191 | 12.308043 | 12.905349 | 8.331045  | 5.927571  | 10.087636 |
| 5.440190  | 11.172968 | 10.240397 | 5.446430  | 11.275489 | 10.415426 |
| 12.636790 | 7.088919  | 11.797613 | 12.684689 | 7.429460  | 12.081521 |
| 11.495395 | 11.052244 | 9.804908  | 11.503566 | 11.198692 | 9.804522  |
| 7.112032  | 8.324885  | 6.613854  | 7.056889  | 8.208189  | 6.932148  |
| 12.546086 | 10.921290 | 7.694982  | 12.504136 | 10.885283 | 7.674601  |
| 12.563185 | 10.780293 | 13.817803 | 12.654637 | 11.252063 | 13.812323 |
| 13.072634 | 8.557634  | 8.114872  | 13.048338 | 8.555347  | 8.285288  |
| 9.563543  | 8.099571  | 13.998895 | 8.112320  | 8.075371  | 11.084305 |
| 11.813726 | 8.476211  | 13.594953 | 9.797765  | 9.602194  | 10.492876 |
|           |           |           | 10.970430 | 12.711131 | 12.778784 |

| Coordinates for Co <sub>49</sub> |           |           | Coordinates for Co <sub>50</sub> |           |           |
|----------------------------------|-----------|-----------|----------------------------------|-----------|-----------|
| X                                | Y         | Z         | X                                | Y         | Z         |
| 11.185789                        | 12.764611 | 8.083188  | 8.933362                         | 10.818933 | 6.164613  |
| 9.685375                         | 8.725286  | 6.256803  | 8.641863                         | 13.202832 | 6.717308  |
| 12.456109                        | 6.612199  | 9.420440  | 6.644300                         | 11.367379 | 12.477963 |
| 8.151682                         | 10.586628 | 6.696807  | 7.257044                         | 9.163431  | 6.959851  |
| 10.576399                        | 10.997194 | 6.482132  | 9.388707                         | 9.251702  | 7.866080  |
| 8.066499                         | 7.988134  | 10.651288 | 10.870590                        | 7.500863  | 7.236774  |
| 8.566555                         | 8.918265  | 8.353297  | 8.476653                         | 7.093733  | 7.601753  |
| 10.982599                        | 9.329504  | 8.133965  | 7.777525                         | 13.478538 | 8.957572  |
| 6.382356                         | 9.850299  | 8.207276  | 10.120335                        | 13.781605 | 8.605733  |
| 8.899396                         | 6.790479  | 7.488504  | 9.073767                         | 11.650867 | 8.392578  |
| 10.188796                        | 7.235533  | 9.467600  | 7.325819                         | 10.008378 | 9.171888  |
| 13.808855                        | 10.287452 | 9.786968  | 10.569408                        | 12.198630 | 10.292950 |
| 9.032106                         | 12.861177 | 6.925386  | 11.150029                        | 9.780136  | 6.357457  |
| 7.269797                         | 12.107711 | 8.459328  | 12.780275                        | 12.270055 | 11.163264 |
| 11.305945                        | 13.331291 | 10.474955 | 7.735371                         | 5.808925  | 9.569795  |
| 11.303009                        | 7.173022  | 7.354819  | 7.735640                         | 9.515847  | 11.595382 |
| 12.090079                        | 9.104650  | 6.083953  | 10.113357                        | 6.187210  | 9.198398  |
| 12.059649                        | 8.727539  | 10.269491 | 11.337542                        | 10.608479 | 8.560523  |
| 6.760534                         | 7.503500  | 8.704445  | 12.027657                        | 10.957545 | 13.126414 |
| 10.115070                        | 10.597057 | 14.052475 | 10.402844                        | 9.297743  | 13.924008 |
| 12.931247                        | 11.811737 | 11.538987 | 9.177966                         | 13.945271 | 10.901550 |
| 11.188214                        | 10.246941 | 12.002768 | 13.531926                        | 10.680125 | 9.433536  |
| 9.154847                         | 13.438904 | 9.311912  | 8.619244                         | 7.943498  | 9.822839  |
| 14.251047                        | 7.942383  | 10.329684 | 8.494959                         | 12.692222 | 12.895502 |
| 11.723439                        | 8.688036  | 13.629502 | 12.502412                        | 6.589229  | 8.825838  |
| 9.277855                         | 13.976882 | 11.694310 | 11.787946                        | 10.141423 | 10.934773 |
| 7.393417                         | 12.660004 | 10.844810 | 13.955948                        | 10.212428 | 11.807795 |
| 13.428383                        | 9.478326  | 12.061480 | 10.848546                        | 12.183863 | 6.884957  |

|           |           |           |           |           |           |
|-----------|-----------|-----------|-----------|-----------|-----------|
| 6.606852  | 10.750429 | 12.145842 | 10.115309 | 8.494721  | 11.721876 |
| 9.574174  | 11.770039 | 10.943321 | 8.441294  | 7.936523  | 13.219658 |
| 7.770991  | 10.228147 | 14.321159 | 11.057805 | 8.326776  | 9.440778  |
| 8.476794  | 12.039741 | 12.983890 | 12.324761 | 8.554599  | 12.596645 |
| 13.328479 | 12.634544 | 9.262212  | 9.207207  | 6.333567  | 11.479102 |
| 9.438952  | 8.363473  | 14.044695 | 12.330634 | 12.735228 | 8.792598  |
| 5.906302  | 8.990294  | 10.419532 | 8.025794  | 11.882522 | 10.682345 |
| 7.688742  | 10.423216 | 10.100463 | 8.201980  | 10.302506 | 13.817427 |
| 9.451775  | 11.223880 | 8.547284  | 13.060917 | 11.144741 | 7.068373  |
| 10.319745 | 7.853004  | 11.881139 | 10.859320 | 13.021043 | 12.487600 |
| 5.534648  | 11.303992 | 10.002990 | 9.517466  | 10.089743 | 10.079278 |
| 12.606591 | 7.213852  | 11.922382 | 11.563384 | 14.301994 | 10.519134 |
| 11.608684 | 11.111388 | 9.721378  | 7.000235  | 11.535025 | 7.384614  |
| 7.278040  | 8.334077  | 6.482036  | 12.802087 | 8.860598  | 7.937040  |
| 12.719271 | 10.880888 | 7.652599  | 10.122276 | 11.693247 | 14.427909 |
| 12.531053 | 10.975633 | 13.788634 | 9.216405  | 8.431026  | 5.684057  |
| 13.198679 | 8.533203  | 8.189672  | 7.017354  | 7.278122  | 11.349623 |
| 8.695024  | 9.693806  | 12.291055 | 10.658865 | 6.924174  | 13.365414 |
| 10.917443 | 12.498083 | 12.746023 | 6.541750  | 7.795341  | 8.827342  |
| 9.847989  | 9.491629  | 10.226278 | 9.806700  | 10.892339 | 12.251597 |
| 8.264723  | 5.951941  | 9.560844  | 13.251372 | 8.391757  | 10.316363 |
|           |           |           | 11.596051 | 6.743520  | 11.104132 |

---
